# Supplementary material
Source: ML conference proceedings conference paper supplement (https://openaccess.thecvf.com/content/CVPR2021/html/Gafni_Dynamic_Neural_Radiance_CVPR_2021_paper.html)
Supplement: Supplementary file 1 [file Gafni_Dynamic_Neural_Radiance_CVPR_2021_supplemental.zip]

Archive with 3 entries (3 files):
- main_video.mp4
- additional_results.mp4
- supplemental.pdf
